# Supplementary figures and images for: A flexible and portable all-fiber temperature sensor based on the upconversion luminescence of octahedral NaBi(WO4)2:Er3+/Yb3+ phosphors
Source: Royal Society of Chemistry journal article supplement (doi:10.1039/d0dt03762a), 2020-12-10

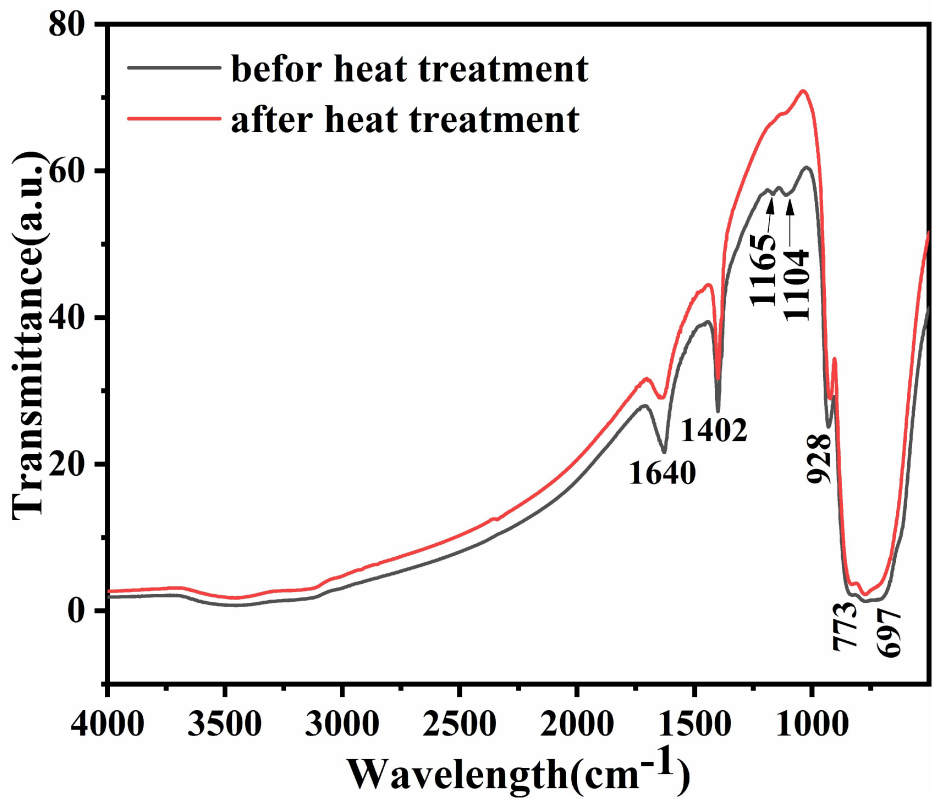

Supplement: d0dt03762a1.pdf [file d0dt03762a1.pdf]
